# Supplementary material for: Efficacy and Safety of Teduglutide in Infants and Children With Short Bowel Syndrome Dependent on Parenteral Support
Source: PubMed Central journal article supplement — J Pediatr Gastroenterol Nutr. 2023 Jun 26;77(3):339–46. doi: 10.1097/MPG.0000000000003867 (PMC10412081; doi:10.1097/mpg.0000000000003867), 2023-06-26
Supplement: mpg-77-339-s001.pdf [file mpg-77-339-s001.pdf]

**Supplemental Digital Content 1.** Key inclusion and exclusion criteria for the core and extension studies

| Study                             | Inclusion                                                                                                                                                                                                                                                                                                                                                                                                                                                                                                                                                                                                                                                                                                    | Exclusion                                                                                                                                                                                                                                                                                                                                                                                                                                                                                                                                                                                                                                                                                            |
|-----------------------------------|--------------------------------------------------------------------------------------------------------------------------------------------------------------------------------------------------------------------------------------------------------------------------------------------------------------------------------------------------------------------------------------------------------------------------------------------------------------------------------------------------------------------------------------------------------------------------------------------------------------------------------------------------------------------------------------------------------------|------------------------------------------------------------------------------------------------------------------------------------------------------------------------------------------------------------------------------------------------------------------------------------------------------------------------------------------------------------------------------------------------------------------------------------------------------------------------------------------------------------------------------------------------------------------------------------------------------------------------------------------------------------------------------------------------------|
| population                        |                                                                                                                                                                                                                                                                                                                                                                                                                                                                                                                                                                                                                                                                                                              |                                                                                                                                                                                                                                                                                                                                                                                                                                                                                                                                                                                                                                                                                                      |
| Infants and children core studies | <ul style="list-style-type: none"> <li>• Diagnosed SBS</li> <li>• Dependent on PS to provide <math>\geq 50\%</math> (NCT03571516) or <math>\geq 30\%</math> (NCT02980666) of fluid or caloric needs</li> <li>• Stable PS requirements <math>\geq 1</math> month prior to screening</li> <li>• Informed consent by the parent or legal guardian</li> <li>• When applicable, informed assent by the patient</li> <li>• Age 4 to <math>&lt;12</math> months (corrected gestational age, infants) or 1–15 years (children) at screening</li> <li>• Weight <math>\geq 5</math> kg at screening and baseline (infants)</li> <li>• Weight-for-length Z-score <math>&gt; -2</math> at screening (infants)</li> </ul> | <ul style="list-style-type: none"> <li>• Intestinal malabsorption due to a genetic condition</li> <li>• Severe, known dysmotility syndrome that was the primary contributing factor to feeding intolerance and inability to reduce PS, prior to screening</li> <li>• Inability to advance oral or enteral feeding due to lack of access to the gut</li> <li>• Known clinically significant untreated intestinal obstruction contributing to feeding intolerance and inability to reduce PS</li> <li>• Major gastrointestinal surgical intervention in the 3 months prior to screening or planned during the study period</li> <li>• Previous use of teduglutide or native/synthetic GLP-2</li> </ul> |

---

|                                             |                                                                                                                                                                                                                                                                                                                                                                                                                                                                                                                               |                                                                                                                                                                                                                                                                                                                               |
|---------------------------------------------|-------------------------------------------------------------------------------------------------------------------------------------------------------------------------------------------------------------------------------------------------------------------------------------------------------------------------------------------------------------------------------------------------------------------------------------------------------------------------------------------------------------------------------|-------------------------------------------------------------------------------------------------------------------------------------------------------------------------------------------------------------------------------------------------------------------------------------------------------------------------------|
|                                             |                                                                                                                                                                                                                                                                                                                                                                                                                                                                                                                               | <ul style="list-style-type: none"> <li>• Previous (within 3 months) or concurrent use of GLP-1; GLP-2; insulin-like growth factor-1; growth hormone, somatostatin, or analogs of these hormones; or glutamine</li> <li>• Renal dysfunction (estimated glomerular filtration rate &lt;50 mL/min/1.73 m<sup>2</sup>)</li> </ul> |
| <p>Infants and children extension study</p> | <ul style="list-style-type: none"> <li>• Completion of study NCT02980666</li> <li>• Decreased PS requirement during prior teduglutide treatment</li> <li>• Increased PS requirements following teduglutide discontinuation</li> <li>• Deteriorating nutritional status despite maximal tolerated enteral nutrition following teduglutide discontinuation</li> <li>• Deteriorating fluid or electrolyte status despite maximal tolerated enteral fluid and electrolyte intake following teduglutide discontinuation</li> </ul> | <ul style="list-style-type: none"> <li>• As above (excluding prior use of teduglutide)</li> </ul>                                                                                                                                                                                                                             |

---

- 
- Cessation of improvements in PS requirements following teduglutide discontinuation

---

GLP = glucagon-like peptide; PS = parenteral support; SBS = short bowel syndrome.
