# Supplementary material for: Efficacy and Safety of Teduglutide in Infants and Children With Short Bowel Syndrome Dependent on Parenteral Support
Source: PubMed Central journal article supplement — J Pediatr Gastroenterol Nutr. 2023 Jun 26;77(3):339–46. doi: 10.1097/MPG.0000000000003867 (PMC10412081; doi:10.1097/mpg.0000000000003867), 2023-06-26
Supplement: mpg-77-339-s007.pdf [file mpg-77-339-s007.pdf]

**Supplemental Digital Content 7.** Z-scores at week 24 and end of treatment for safety populations

| Parameter                       | Infants          |                          |                              | Children*         |                               |
|---------------------------------|------------------|--------------------------|------------------------------|-------------------|-------------------------------|
|                                 | Core study       |                          | Extension study <sup>‡</sup> | Core study        | Extension study <sup>‡§</sup> |
|                                 | SoC              | Teduglutide <sup>†</sup> |                              |                   |                               |
| <b>Weight-for-age Z-score</b>   |                  |                          |                              |                   |                               |
| Baseline                        |                  |                          |                              |                   |                               |
| n                               | 5                | 7                        | 2                            | 8                 | 7                             |
| Mean (SD)                       | -0.6 (1.3)       | -1.5 (2.0)               | -2.9 (2.7)                   | -1.9 (1.4)        | -1.9 (1.5)                    |
| Median (min, max)               | 0.1 (-2.8, 0.3)  | -0.7 (-4.8, 0.8)         | -2.9 (-4.8, -1.0)            | -1.9 (-3.8, -0.2) | -1.6 (-3.8, -0.2)             |
| Week 24                         |                  |                          |                              |                   |                               |
| N                               | 3                | 6                        | -                            | 7                 | -                             |
| Mean (SD)                       | -1.4 (1.9)       | -0.6 (1.1)               | -                            | -1.9 (2.1)        | -                             |
| Median (min, max)               | -0.9 (-3.4, 0.2) | -0.7 (-1.9, 0.7)         | -                            | -1.3 (-5.4, -0.0) | -                             |
| Change from baseline, mean (SD) | -0.3 (0.3)       | 0.4 (1.5)                | -                            | 0.0 (0.8)         | -                             |
| Week 48                         |                  |                          |                              |                   |                               |
| N                               | -                | -                        | 2                            | -                 | 6                             |

|                                                   |                  |                  |                   |                   |                   |
|---------------------------------------------------|------------------|------------------|-------------------|-------------------|-------------------|
| Mean (SD)                                         | -                | -                | 0.4 (0.0)         | -                 | -1.8 (2.0)        |
| Median (min, max)                                 | -                | -                | 0.4 (0.3, 0.4)    | -                 | -1.0 (-4.9, -0.1) |
| Change from baseline, mean (SD)                   | -                | -                | 3.3 (2.6)         | -                 | 0.0 (0.8)         |
| End of treatment                                  |                  |                  |                   |                   |                   |
| n                                                 | 4                | 6                | 2                 | 8                 | 6                 |
| Mean (SD)                                         | -0.8 (1.9)       | -0.6 (1.1)       | 0.4 (0.0)         | -1.9 (1.9)        | -1.8 (2.0)        |
| Median (min, max)                                 | -0.3 (-3.4, 1.0) | -0.7 (-1.9, 0.7) | 0.4 (0.3, 0.4)    | -1.8 (-5.4, -0.0) | -1.0 (-4.9, -0.1) |
| Change from baseline, mean (SD)                   | 0.0 (0.6)        | 0.5 (1.5)        | 3.3 (2.6)         | 0.0 (0.8)         | 0.0 (0.8)         |
| <b>Length/height-for-age Z-score<sup>II</sup></b> |                  |                  |                   |                   |                   |
| Baseline                                          |                  |                  |                   |                   |                   |
| n                                                 | 5                | 7                | 2                 | 8                 | 7                 |
| Mean (SD)                                         | 0.1 (1.3)        | -1.5 (2.3)       | -3.7 (1.1)        | -2.2 (1.4)        | -2.0 (1.4)        |
| Median (min, max)                                 | 0.4 (-2.1, 1.2)  | -1.2 (-4.5, 1.3) | -3.7 (-4.5, -2.8) | -2.6 (-3.4, 0.5)  | -2.5 (-3.3, 0.5)  |
| Week 24                                           |                  |                  |                   |                   |                   |
| n                                                 | 2                | 6                | -                 | 7                 | -                 |
| Mean (SD)                                         | -0.9 (1.9)       | -0.9 (1.4)       | -                 | -1.9 (1.4)        | -                 |

|                                  |                  |                  |                   |                  |                   |
|----------------------------------|------------------|------------------|-------------------|------------------|-------------------|
| Median (min, max)                | -0.9 (-2.2, 0.5) | -0.2 (-2.9, 0.2) | -                 | -2.3 (-3.6, 0.4) | -                 |
| Change from baseline, mean (SD)  | -0.4 (0.4)       | 0.1 (1.4)        | -                 | 0.1 (0.4)        | -                 |
| <b>Week 48</b>                   |                  |                  |                   |                  |                   |
| n                                | -                | -                | 2                 | -                | 6                 |
| Mean (SD)                        | -                | -                | -2.3 (0.8)        | -                | -1.9 (1.7)        |
| Median (min, max)                | -                | -                | -2.3 (-2.9, -1.7) | -                | -2.4 (-4.0, 0.4)  |
| Change from baseline, mean (SD)  | -                | -                | 1.4 (0.3)         | -                | 0.0 (0.6)         |
| <b>End of treatment</b>          |                  |                  |                   |                  |                   |
| n                                | 3                | 6                | 2                 | 8                | 6                 |
| Mean (SD)                        | -0.2 (1.8)       | -0.9 (1.4)       | -2.3 (0.8)        | -2.1 (1.5)       | -1.9 (1.7)        |
| Median (min, max)                | 0.5 (-2.2, 1.3)  | -0.2 (-2.9, 0.2) | -2.3 (-2.9, -1.7) | -2.5 (-3.6, 0.4) | -2.4 (-2.4, -2.4) |
| Change from baseline, mean (SD)  | 0.0 (0.8)        | 0.1 (1.4)        | 1.4 (0.3)         | 0.0 (0.4)        | 0.0 (0.6)         |
| <b>Weight-for-length Z-score</b> |                  |                  |                   |                  |                   |
| <b>Baseline</b>                  |                  |                  |                   |                  |                   |
| n                                | 5                | 7                | 2                 | 8                | 7                 |
| Mean (SD)                        | -0.8 (1.1)       | -0.9 (2.3)       | -1.3 (4.9)        | -                | -                 |

|                                 |                  |                   |                  |   |   |
|---------------------------------|------------------|-------------------|------------------|---|---|
| Median (min, max)               | -0.1 (-2.2, 0.2) | -0.30 (-4.8, 2.1) | -1.3 (-4.8, 2.1) | - | - |
| Week 24                         |                  |                   |                  |   |   |
| n                               | 3                | 6                 | -                | - | - |
| Mean (SD)                       | -1.3 (2.1)       | -0.2 (1.6)        | -                | - | - |
| Median (min, max)               | -1.5 (-3.3, 0.8) | -0.5 (-1.9, 2.4)  | -                | - | - |
| Change from baseline, mean (SD) | -0.1 (1.00)      | 0.4 (2.00)        | -                | - | - |
| Week 48                         |                  |                   |                  |   |   |
| n                               | -                | -                 | 2                | - | - |
| Mean (SD)                       | -                | -                 | 2.0 (0.6)        | - | - |
| Median (min, max)               | -                | -                 | 2.0 (1.6, 2.5)   | - | - |
| Change from baseline, mean (SD) | -                | -                 | 3.4 (4.3)        | - | - |
| End of treatment                |                  |                   |                  |   |   |
| n                               | 4                | 6                 | 2                | - | - |
| Mean (SD)                       | -0.9 (1.9)       | -0.2 (1.6)        | 2.0 (0.6)        | - | - |
| Median (min, max)               | -0.5 (-3.3, 0.8) | -0.5 (-1.9, 2.4)  | 2.0 (1.6, 2.5)   | - | - |
| Change from baseline, mean (SD) | 0.1 (0.9)        | 0.4 (2.0)         | 3.4 (4.3)        | - | - |

**BMI-for-age Z-score**

## Baseline

|                   |   |   |   |                  |                  |
|-------------------|---|---|---|------------------|------------------|
| n                 | 5 | 7 | 2 | 8                | 7                |
| Mean (SD)         | - | - | - | -0.9 (1.5)       | -1.0 (1.6)       |
| Median (min, max) | - | - | - | -0.8 (-3.6, 1.2) | -1.0 (-3.6, 1.2) |

## Week 24

|                                 |   |   |   |                  |   |
|---------------------------------|---|---|---|------------------|---|
| n                               |   |   |   | 7                | - |
| Mean (SD)                       | - | - | - | -0.9 (1.8)       | - |
| Median (min, max)               | - | - | - | -0.7 (-3.3, 1.3) | - |
| Change from baseline, mean (SD) | - | - | - | 0.0 (0.8)        | - |

## Week 48

|                                 |   |   |   |   |                  |
|---------------------------------|---|---|---|---|------------------|
| n                               | - | - | - | - | 6                |
| Mean (SD)                       | - | - | - | - | -0.7 (1.5)       |
| Median (min, max)               | - | - | - | - | -0.8 (-2.4, 1.3) |
| Change from baseline, mean (SD) | - | - | - | - | 0.1 (0.7)        |

## End of treatment

|                                 |     |     |     |                  |                  |
|---------------------------------|-----|-----|-----|------------------|------------------|
| n                               |     |     |     | 7                | 6                |
| Mean (SD)                       | N/A | N/A | N/A | -0.9 (1.7)       | -0.7 (1.5)       |
| Median (min, max)               | N/A | N/A | N/A | -0.5 (-3.3, 1.3) | -0.8 (-2.4, 1.3) |
| Change from baseline, mean (SD) | N/A | N/A | N/A | -0.0 (0.8)       | 0.1 (0.7)        |

**Head circumference-for-age Z-score**

Baseline

|                   |                  |                 |                 |                |                |
|-------------------|------------------|-----------------|-----------------|----------------|----------------|
| n                 | 5                | 7               | 2               | 8              | 7              |
| Mean (SD)         | -0.1 (1.7)       | 0.5 (1.6)       | 0.0 (2.8)       | 2.6 (-)        | 2.6 (-)        |
| Median (min, max) | -0.4 (-1.7, 2.8) | 0.8 (-2.0, 2.1) | 0.0 (-2.0, 2.0) | 2.6 (2.6, 2.6) | 2.6 (2.6, 2.6) |

Week 24

|                                 |                   |                 |   |   |   |
|---------------------------------|-------------------|-----------------|---|---|---|
| n                               | 2                 | 6               | - | - | - |
| Mean (SD)                       | -1.2 (1.6)        | 0.7 (1.2)       | - | - | - |
| Median (min, max)               | -1.2 (-2.4, -0.0) | 0.3 (-0.8, 3.8) | - | - | - |
| Change from baseline, mean (SD) | -0.2 (0.7)        | 0.1 (1.1)       | - | - | - |

Week 48

|   |   |   |   |   |   |
|---|---|---|---|---|---|
| n | - | - | 2 | - | - |
|---|---|---|---|---|---|

|                                 |                   |                 |                 |     |     |
|---------------------------------|-------------------|-----------------|-----------------|-----|-----|
| Mean (SD)                       | -                 | -               | 2.4 (3.46)      | -   | -   |
| Median (min, max)               | -                 | -               | 2.4 (-0.0, 4.9) | -   | -   |
| Change from baseline, mean (SD) | -                 | -               | 2.4 (0.65)      | -   | -   |
| End of treatment                |                   |                 |                 |     |     |
| n                               | 3                 | 6               | 2               |     |     |
| Mean (SD)                       | -1.1 (1.2)        | 0.7 (1.7)       | 2.4 (3.5)       | N/A | N/A |
| Median (min, max)               | -0.9 (-2.4, -0.0) | 0.3 (-0.8, 3.8) | 2.4 (-0.0, 4.9) | N/A | N/A |
| Change from baseline, mean (SD) | -0.3 (0.5)        | 0.1 (1.1)       | 2.4 (0.7)       | N/A | N/A |

---

End of treatment is the last available measurement during the 24-week treatment period.

\*For study NCT02980666 and its extension NCT03268811, six of eight children were enrolled and received teduglutide treatment after protocol amendment, which included improved training for parents to administer doses of teduglutide to patients.

<sup>†</sup>Data pooled from studies NCT03571516 (n = 5; patients randomized to receive teduglutide treatment compared with SoC group) and NCT02980666 (N = 2; patients only received teduglutide).

<sup>‡</sup>Data compared with core study baseline.

<sup>§</sup>Of the children enrolled in the extension study, one child did not receive teduglutide owing to ongoing enteral autonomy from the core study.

<sup>||</sup>Length Z-score calculated for infants and height Z-score recorded for children.

BMI = body mass index; N/A = not applicable; SD = standard deviation; SoC = standard of care.
